# Supplementary material for: A global monthly 3D field of seawater pH over 3 decades: a machine learning approach
Source: Copernicus journal article supplement (doi:10.5194/essd-17-719-2025), 2025-02-24
Supplement: Supplementary file 1 [file essd-17-719-2025-supplement.pdf]

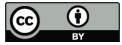

*Supplement of*

## **A global monthly 3D field of seawater pH over 3 decades: a machine learning approach**

**Guorong Zhong et al.**

*Correspondence to:* Xuegang Li ([lixuegang@qdio.ac.cn](mailto:lixuegang@qdio.ac.cn)) and Jinming Song ([jmsong@qdio.ac.cn](mailto:jmsong@qdio.ac.cn))

The copyright of individual parts of the supplement might differ from the article licence.

## 1 S1. Uncertainty and construction method of selected ocean products

2 A group of products related to the physical, chemical, and biological activities that  
3 influence the ocean carbonate system were collected as potential pH predictors (Table  
4 1). These products were constructed using different methods in previous research. The  
5 seawater temperature and salinity product were constructed based on measurements  
6 from the World Ocean Database (WOD) using the ensemble optimal interpolation  
7 method with the dynamic ensemble (EnOI-DE) provided by CMIP5 historical  
8 simulations (Cheng et al., 2016; Cheng et al., 2020). The temperature product was  
9 claimed with an uncertainty of about  $\pm 0.05^{\circ}\text{C}$  in the recent few decades, and the  
10 uncertainty of salinity product was about  $\pm 0.001 \sim \pm 0.005$  at different depths (present as  
11 figures in Cheng et al., 2016 and Cheng et al., 2020;  
12 <https://journals.ametsoc.org/view/journals/clim/33/23/full-jcliD200366-f5.jpg> and  
13 <https://journals.ametsoc.org/view/journals/clim/29/15/full-jcli-d-15-0730.1-f8.jpg>).

14 The climatological Alk product was constructed from Global Ocean Data Analysis  
15 Project version 2.2019 (GLODAPv2019) measurements using a neural network  
16 (NNGv2) method, with the RMSE of  $3\text{--}6.2 \mu\text{mol kg}^{-1}$  (Broullón et al., 2019). The  
17 climatological DIC product was constructed from GLODAPv2019 and the Lamont–  
18 Doherty Earth Observatory (LDEO) datasets using a feedforward neural network  
19 (dubbed NNGv2LDEO) method, with a RMSE of  $3.6\text{--}13.2 \mu\text{mol kg}^{-1}$  (Broullón et al.,  
20 2020). The climatological dissolved oxygen, nitrate, phosphate, and silicate product  
21 was constructed based on measurements from the World Ocean Database, using an  
22 objective analysis method that generated a first-guess field and then carried out a  
23 correction at all gridpoints as a distance-weighted mean of all gridpoint difference  
24 values that lie within the area around the gridpoint defined by the influence radius  
25 (Garcia et al., 2019a; Garcia et al., 2019b). The producer claimed an average DO bias  
26 of  $0.4 \pm 4.7 \mu\text{mol kg}^{-1}$  below 500 m depth and  $1.4 \pm 10.9 \mu\text{mol kg}^{-1}$  above 500 m depth.  
27 The average biases of nutrient concentration were  $-0.02 \pm 0.07 \mu\text{mol kg}^{-1}$  for phosphate,  
28  $-0.22 \pm 0.95 \mu\text{mol kg}^{-1}$  for nitrate, and  $-0.3 \pm 3.8 \mu\text{mol kg}^{-1}$  for silicate below 500 m depth,  
29 and were  $0.01 \pm 0.12 \mu\text{mol kg}^{-1}$  for phosphate,  $0.2 \pm 1.8 \mu\text{mol kg}^{-1}$  for nitrate, and  $0.8 \pm 3.6$   
30  $\mu\text{mol kg}^{-1}$  for silicate above 500 m depth. The Sea surface height (SSH), mixed layer  
31 depth (MLD), and W velocity of ocean current from the ECCO2 cube92 product were  
32 constructed by least squares fit of a global full-depth-ocean and sea-ice configuration  
33 of the Massachusetts Institute of Technology general circulation model to the available  
34 satellite and in-situ data (Menemenlis et al., 2008). The basin-wide median bias error

35 of the MLD product is -6.6 m and the RMSE is 40 m, and the RMSE of the SSH product  
36 is 9.2 cm. The ERA5 sea level pressure and surface pressure were constructed by the  
37 Integrated Forecasting System (IFS) Cy41r2 model (Hersbach et al., 2020). The  
38 standard deviation of ERA5 sea level pressure and surface pressure are within 1 hPa  
39 and 0.8 hPa in the recent three decades. The NOAA Greenhouse Gas Marine Boundary  
40 Layer Reference xCO<sub>2</sub> product is constructed by extending measurements from a subset  
41 of sites from the NOAA Cooperative Global Air Sampling Network, with an uncertainty  
42 within 1  $\mu\text{mol mol}^{-1}$  in most regions (Lan et al., 2023,  
43 <https://gml.noaa.gov/ccgg/mbl/mbl.html>). The bi-monthly Multivariate El  
44 Niño/Southern Oscillation index (MEI) was calculated by the first seasonally varying  
45 principal component of six atmosphere–ocean (COADS) variable fields in the tropical  
46 Pacific basin (Wolter et al., 2011). The Arctic Oscillation index was calculated as the  
47 first leading mode from the Empirical Orthogonal Function analysis of monthly mean  
48 height anomalies at 1000-hPa of the Northern Hemisphere or 700-hPa of the Southern  
49 Hemisphere (CPC, 2002). The Southern Oscillation Index was calculated based on the  
50 differences in air pressure anomaly between Tahiti and Darwin, Australia (CPC, 2005).  
51 The specific uncertainty of these index products is not provided. The GEBCO global  
52 bathymetric data was constructed using predicted depths based on the V32 gravity  
53 model (Sandwell et al., 2019). The monthly surface ocean  $p\text{CO}_2$  was constructed using  
54 the SOM-FFNN method based on regional-specific predictors selected by the stepwise  
55 FFNN algorithm, with a global RMSE of 17.99  $\mu\text{atm}$  (Zhong et al., 2022). A  
56 climatological  $p\text{CO}_2$  product constructed by another SOM-FFNN model was also used,  
57 with the RMSE of 18.3  $\mu\text{atm}$  (Landschützer et al., 2020). The Euphotic Depth product  
58 was constructed from remote sensing reflectance (RRS) data derived inherent optical  
59 properties using Lee algorithm (Lee et al., 2007), with an average percentage error of  
60 13.7%. The chlorophyll concentration product was constructed based on RRS at 2-4  
61 wavelengths between 440 and 670 nm with an uncertainty of 1-2%, using the algorithm  
62 of Hu et al. (2019) that combines an empirical band difference approach at low  
63 chlorophyll concentrations with a band ratio approach at higher chlorophyll  
64 concentrations. The photosynthetically available radiation (PAR) product was based on  
65 the observed Top-of-Atmosphere (TOA) radiances in the 400-700nm range that do not  
66 saturate over clouds using the algorithm of Frouin et al. (2002), with an RMSE of 3.6  
67 Einstein/m<sup>2</sup>/day. The product of the diffuse attenuation coefficient at 490 nm (K<sub>d490</sub>)  
68 was calculated using an empirical relationship derived from in situ measurements

69 of Kd490 and blue-to-green band ratios of RRS. The remote sensing reflectance  
70 product was derived from ocean color sensors based on the spectral distribution of  
71 reflected visible solar radiation upwelling from below the ocean surface and passing  
72 through the sea-air interface. The total absorption and backscattering products were  
73 calculated using the default global configuration of the Generalized Inherent Optical  
74 Property (GIOP) model (Werdell et al., 2013).

#### 75 S2. Validation of cross-boundary method

76 The cross-boundary method reduced the pH predicting error slightly, but improved  
77 the discontinuity problem in the SOM boundary effectively (Figure S1 a-d). However,  
78 the discontinuity problem was not completely solved and some boundary line existed  
79 in the spatial distribution, especially in the deeper ocean that pH measurements are  
80 much sparser (Figure S1 e-f). Even so, the performance of FFNN predicting was better  
81 when the cross-boundary method was applied. Compared with taking average in the  
82 boundary area, the cross-boundary method avoided subjectively modifying the  
83 boundary data. Correspondingly, this method may not solve the discontinuity problem  
84 perfectly in some situations. The cross-boundary method also decreased the  
85 predicting error slightly in vertical boundary areas (2 layers near the mixed layer depth).  
86 However, the improvement was minor in the vertical distribution, due to the natural  
87 existing substantial vertical gradient of seawater pH near the mixed layer depth (Figure  
88 S2). Overall, the cross-boundary method increases information about seawater pH  
89 variation out of boundaries in the neural network learning process, reducing the outliers  
90 near the SOM boundary and vertical boundary.

#### 91 S3. Comparison of performance between FFNNs training based on pH and [H<sup>+</sup>]

92 Due to the logarithmic relationship between pH value and [H<sup>+</sup>] concentration,  
93 results obtained from training FFNN with pH and from training FFNN with [H<sup>+</sup>] then  
94 converting outputs into pH may differ. A comparison of predicting errors was conducted  
95 between these two training methods. The results show a nearly consistent pH RMSE  
96 between the FFNN training with pH and with [H<sup>+</sup>] (Figure 7). As the pH measurements  
97 of all GLODAP samples are closer to a normal distribution than the [H<sup>+</sup>], the predicting  
98 error was slightly lower in most regions when the FFNN was trained with pH, but the  
99 difference in predicting errors was extremely small. In addition, the FFNN trained using  
100 [H<sup>+</sup>] occasionally produced negative [H<sup>+</sup>] in regions with extremely low [H<sup>+</sup>].  
101 Therefore, it is better to train FFNN using pH rather than using [H<sup>+</sup>] in the  
102 reconstruction process of the pH product.

103        The distribution patterns of regional pH RMSE and  $[H^+]$  RMSE are inconsistent  
104 whenever the FFNN was trained using pH or  $[H^+]$ . In fact, the pH RMSE of the  
105 intermediate layer in regions such as the subarctic North Pacific and the equatorial  
106 Pacific is significantly lower than that in the intermediate layer of the Arctic Ocean, but  
107 their  $[H^+]$  RMSE is higher than that of the intermediate layer in the Arctic Ocean (Figure  
108 7a and 7b). This is caused by the effect of the logarithmic relationship. If the pH values  
109 are different for the same pH RMSE, the corresponding  $[H^+]$  RMSE will be different.  
110 Therefore, the uncertainty of the pH product is calculated based on the  $[H^+]$  RMSE and  
111 pH value, rather than solely based on the pH RMSE.  
112  
113

114 **Figure S1. Statistical distribution of GLODAP samples used for training and testing in each**  
 115 **province.** Iteration 1-4: repeated evaluation with different training and testing samples dividing by  
 116 years. Samples in 1992, 1996, ..., 2020 were used for testing and the rest were used for training in  
 117 iteration 1; samples in 1993, 1997, ..., 2017 were used for testing and the rest were used for  
 118 training in iteration 2.

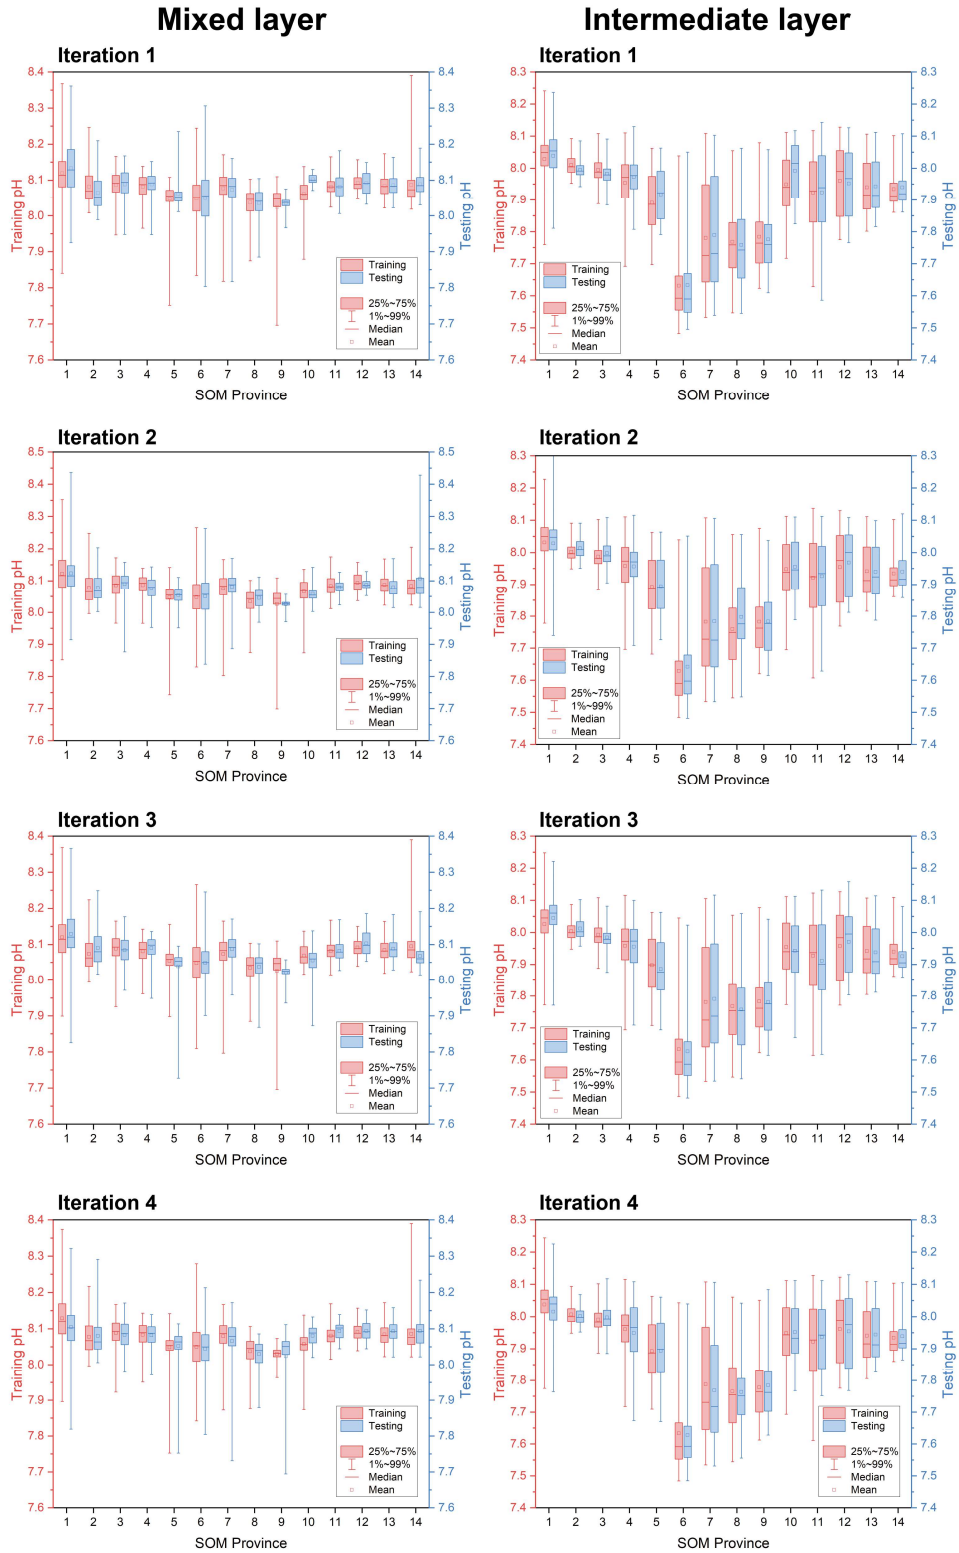

121 **Figure S2. Validation of cross-boundary method for pH predicting in the SOM boundary.** a-  
122 b): comparison of FFNN predicted pH with GLODAP in all SOM boundary areas; c-f):  
123 comparison of spatial distribution at 0 m and 1000 m in January 2020.

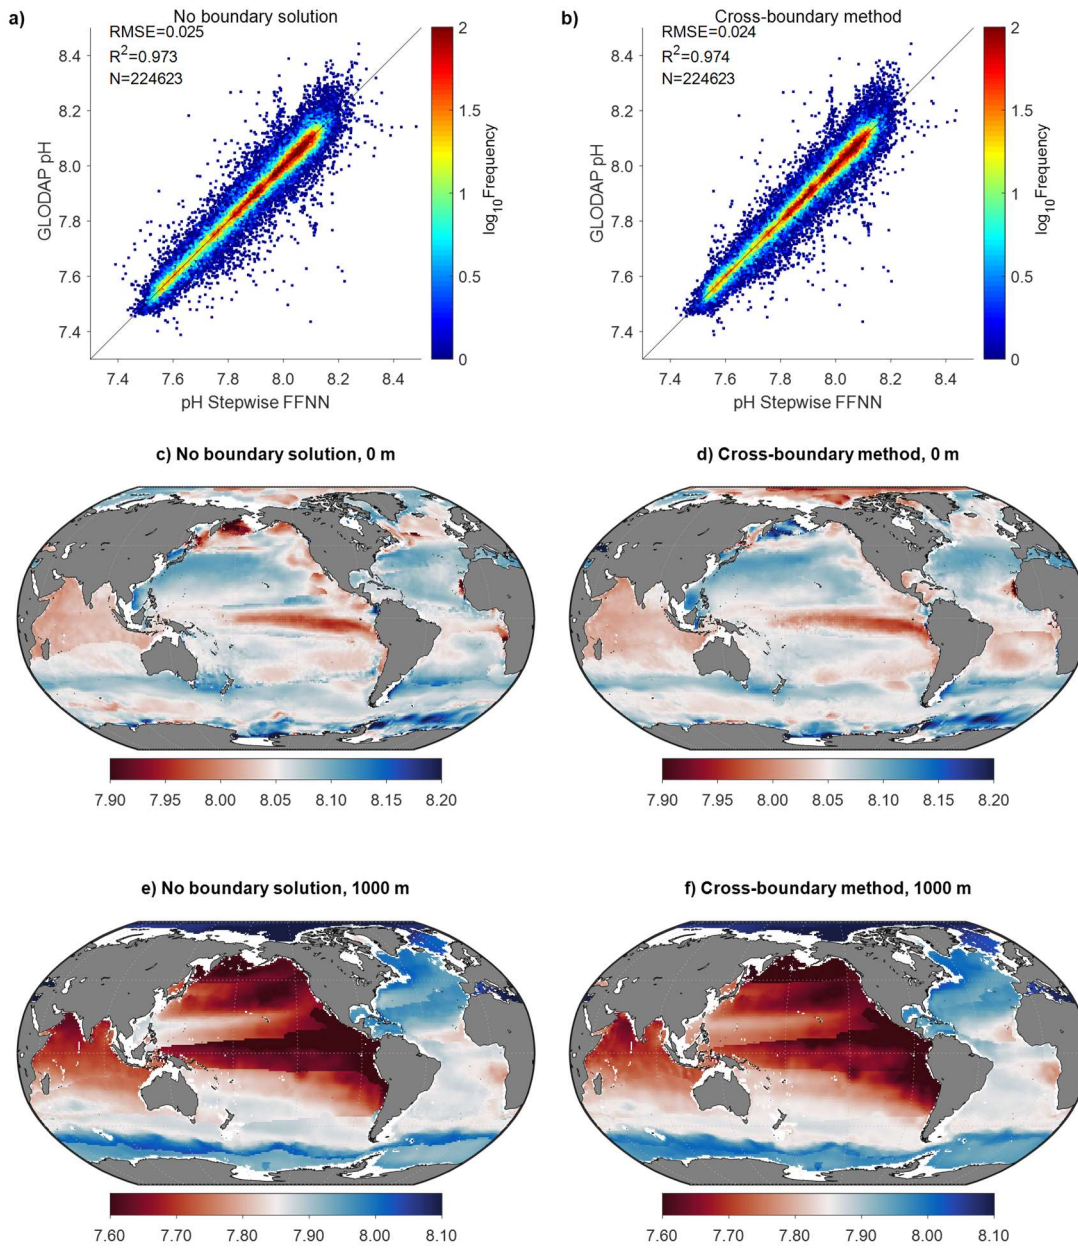

124

125

126

127

128 **Figure S3. Validation of cross-boundary method for pH predicting in the vertical boundary.**  
 129 a) and b): comparison of FFNN predicted pH with GLODAP in all vertical boundary areas (2  
 130 layers near the mixed layer depth); c) and d): comparison of vertical distribution at different basin  
 131 in January 2020.

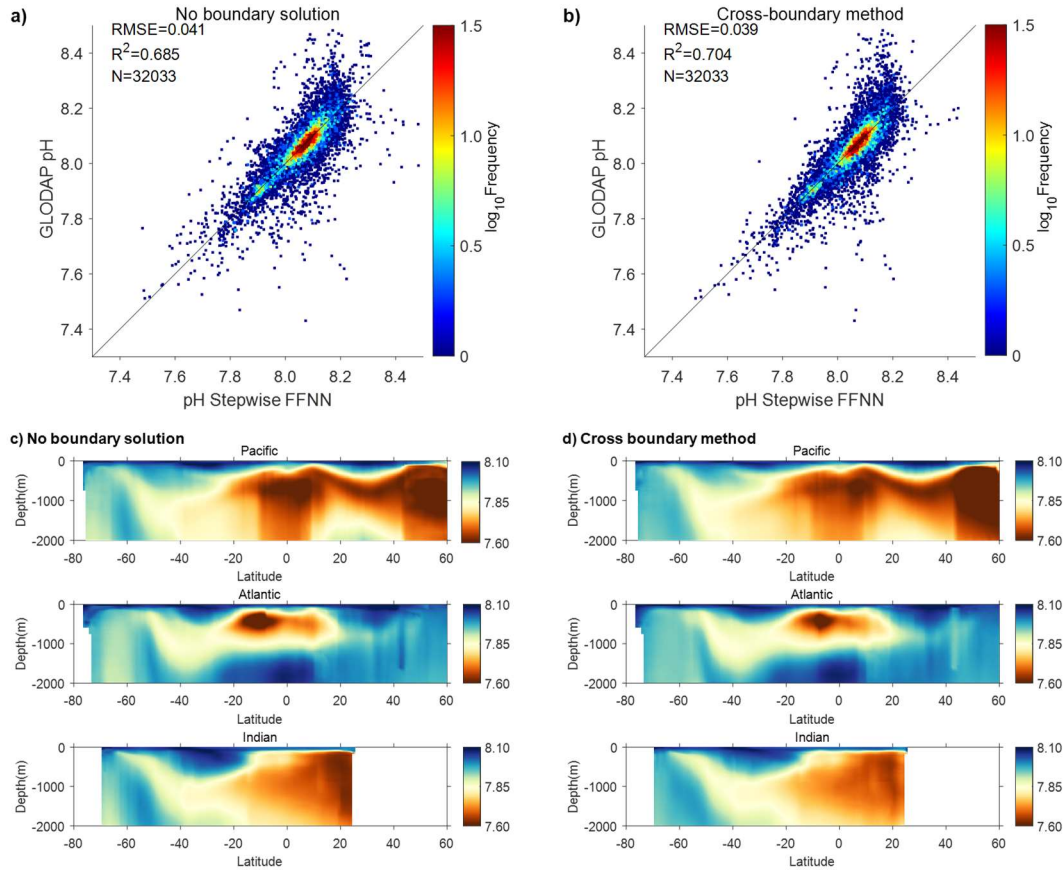

132

133 **Figure S4. Comparison of pH RMSE and  $[H^+]$  RMSE from training FFNN using pH and using**  
 134  **$[H^+]$ .** a): pH RMSE of FFNN trained using pH and  $[H^+]$  in each biogeochemical province, the  
 135 predicted  $[H^+]$  from FFNN trained using  $[H^+]$  was converted to pH for estimating pH RMSE. b):  
 136  $[H^+]$  RMSE of FFNN trained using pH and  $[H^+]$  in each biogeochemical province; c):  $[H^+]$  RMSE  
 137 of FFNN trained using pH and  $[H^+]$  in each vertical layer; the predicted pH from FFNN trained  
 138 using pH was converted to  $[H^+]$  for estimating  $[H^+]$  RMSE. The numbers shown in the X-axis  
 139 represent the SOM province in Figure 1.  
 140

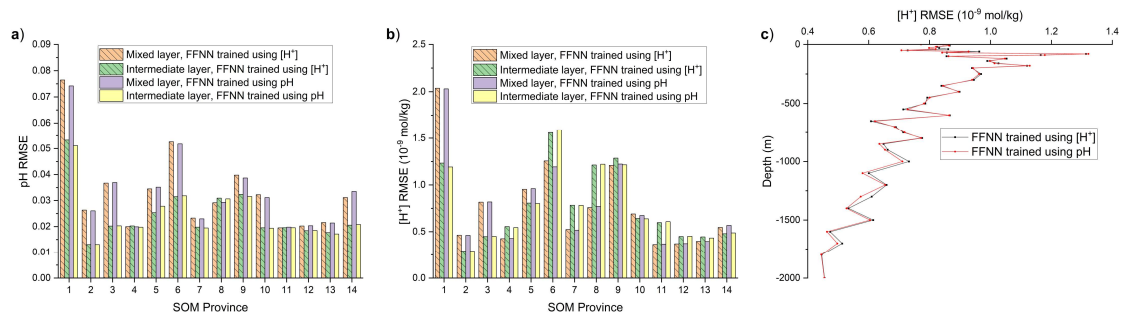

141

142

143



144 **Figure S5. Mean standard deviation between FFNN pH with different initial status.**

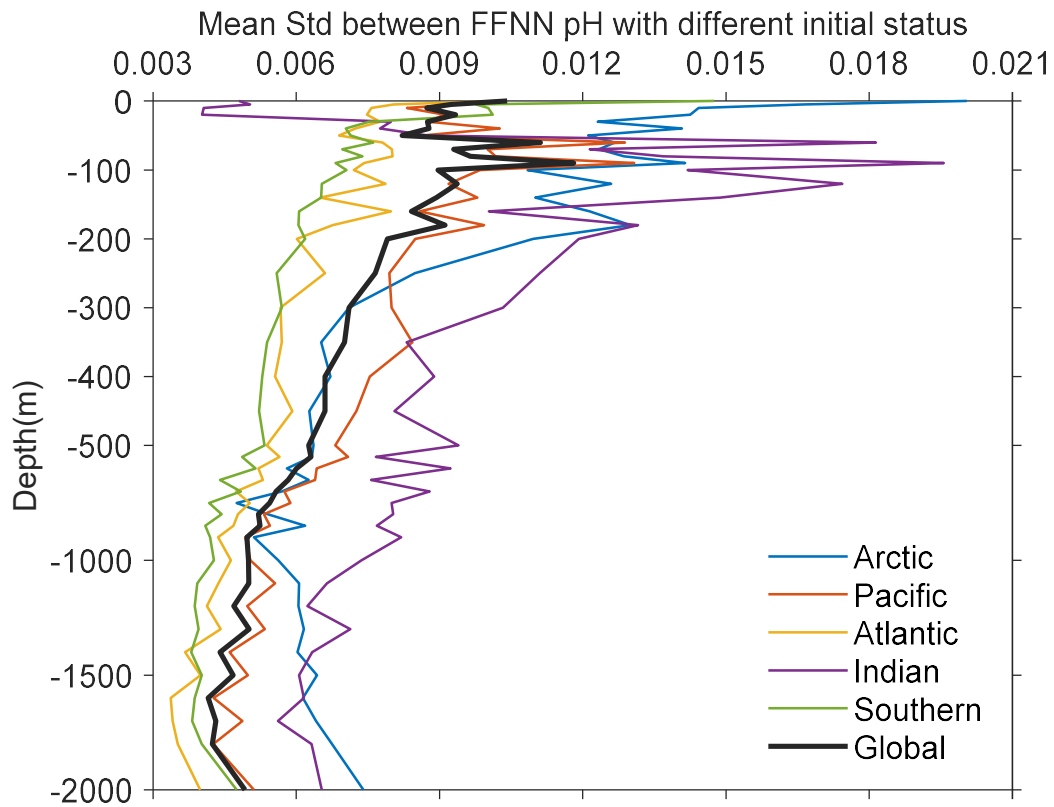

145

146

147

148 **Figure S6. Station map of used delayed-mode BGC-Argo pH-adjusted data with quality**  
149 **control flag 1.**

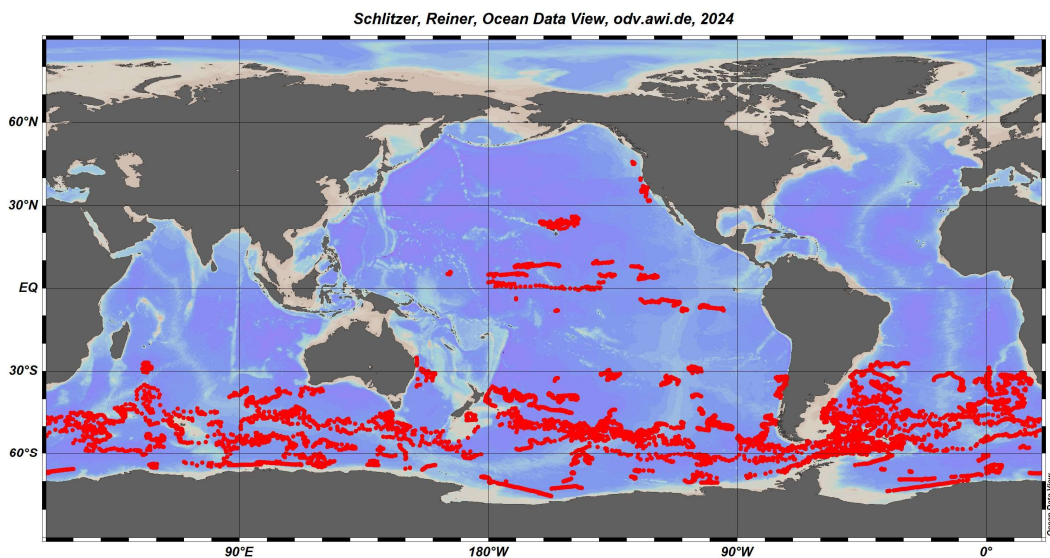

150

151

152

153

154

155 **Table S1. Predictors selected by the stepwise FFNN algorithm in the Mixed layer for period**  
 156 **before August 2002.** The predictors are arranged in order of relative importance, with the  
 157 variables listed at the front of each province being more effective in reducing predicting errors  
 158 when used as pH predictors.

| Province                       | FFNN neurons | Predictors                                                                                   |
|--------------------------------|--------------|----------------------------------------------------------------------------------------------|
| P5 Equatorial Atlantic         | 25           | Phosphate, Temp, SLP, DIC, $P_{surf}$ , TA, $pCO_2$ , $W_{vel}(in-situ)$ , DO                |
| P8 Equatorial Pacific          | 10           | $pCO_2$ , Depth, sLat, Temp, Sal, DIC, $W_{vel}(in-situ)$ , Nitrate                          |
| P10 Subtropical South Atlantic | 20           | $pCO_2$ , Silicate, Nitrate, $W_{vel}(65m)$ , $W_{vel}(in-situ)$ , $W_{vel}(195m)$           |
| P11 Subtropical South Pacific  | 10           | Phosphate, $pCO_2$ , Depth, sLat, Silicate, $pCO_2_{clim}$ , $W_{vel}(5m)$ , $W_{vel}(105m)$ |

159  
 160  
 161

162 **References mentioned in supplementary text:**

- 163 Broullón, D., Pérez, F. F., Velo, A., Hoppema, M., Olsen, A., Takahashi, T., Key, R.  
 164 M., Tanhua, T., González-Dávila, M., Jeansson, E., Kozyr, A., and van Heuven, S.  
 165 M. A. C.: A global monthly climatology of total alkalinity: a neural network  
 166 approach, *Earth Syst. Sci. Data*, 11, 1109–1127, [https://doi.org/10.5194/essd-11-](https://doi.org/10.5194/essd-11-1109-2019)  
 167 1109-2019, 2019.
- 168 Broullón, D., Pérez, F. F., Velo, A., Hoppema, M., Olsen, A., Takahashi, T., Key, R.  
 169 M., Tanhua, T., Santana-Casiano, J. M., and Kozyr, A.: A global monthly  
 170 climatology of oceanic total dissolved inorganic carbon: a neural network approach,  
 171 *Earth Syst. Sci. Data*, 12, 1725–1743, <https://doi.org/10.5194/essd-12-1725-2020>,  
 172 2020.
- 173 Cheng, L. and Zhu, J.: Benefits of CMIP5 multimodel ensemble in reconstructing  
 174 historical ocean subsurface temperature variations, *J. Clim.*, 29, 5393-5416,  
 175 <https://doi.org/10.1175/JCLI-D-15-0730.1>, 2016.
- 176 Cheng, L., Trenberth, K. E., Gruber, N., Abraham, J. P., Fasullo, J. T., Li, G., Mann,  
 177 M. E., Zhao, X., and Zhu, J.: Improved estimates of changes in upper ocean salinity  
 178 and the hydrological cycle, *J. Clim.*, 33, 10357-10381, [https://doi.org/10.1175/JCLI-](https://doi.org/10.1175/JCLI-D-20-0366.1)  
 179 D-20-0366.1, 2020.
- 180 Climate Prediction Center: Daily Arctic Oscillation Index [data set],  
 181 [https://www.cpc.ncep.noaa.gov/products/precip/CWlink/daily\\_ao\\_index/ao\\_index.](https://www.cpc.ncep.noaa.gov/products/precip/CWlink/daily_ao_index/ao_index.html)  
 182 html, 2002.
- 183 Climate Prediction Center: Southern Oscillation Index [data set],  
 184 [https://www.cpc.ncep.noaa.gov/products/analysis\\_monitoring/ensocycle/soi.shtml](https://www.cpc.ncep.noaa.gov/products/analysis_monitoring/ensocycle/soi.shtml),  
 185 2005.
- 186 Frouin, R., Franz, B. A., and Werdell, P. J.: The SeaWiFS PAR product. ,In: S.B.  
 187 Hooker and E.R. Firestone, Algorithm Updates for the Fourth SeaWiFS Data

188 Reprocessing, NASA Tech. Memo, 2003-206892, Volume 22, NASA Goddard  
189 Space Flight Center, Greenbelt, Maryland, 46-50, 2002.

190 Garcia, H. E., Weathers, K. W., Paver, C. R., Smolyar, I., Boyer, T. P., Locarnini, R.  
191 A., Zweng, M. M., Mishonov, A. V., Baranova, O. K., Seidov, D., and Reagan, J. R.:  
192 World Ocean Atlas 2018, Volume 3: Dissolved Oxygen, Apparent Oxygen  
193 Utilization, and Dissolved Oxygen Saturation, edited by: Mishonov, A., NOAA  
194 Atlas NESDIS 83, 38 pp., <https://www.nodc.noaa.gov/OC5/woa18/pubwoa18.htm>,  
195 2019a.

196 Garcia, H. E., Weathers, K. W., Paver, C. R., Smolyar, I., Boyer, T. P., Locarnini, R.  
197 A., Zweng, M. M., Mishonov, A. V., Baranova, O. K., Seidov, D., and Reagan, J. R.:  
198 World Ocean Atlas 2018. Vol. 4: Dissolved Inorganic Nutrients (phosphate, nitrate  
199 and nitrate+nitrite, silicate). A. Mishonov Technical Editor, NOAA Atlas NESDIS  
200 84, 35 pp., <https://archimer.ifremer.fr/doc/00651/76336/>, 2019b.

201 Hersbach, H., Bell, B., Berrisford, P., Hirahara, S., Horányi, A., Muñoz-Sabater, J.,  
202 Nicolas J., Peubey C., Radu R., Schepers D., Simmons A., Soci  
203 C., Abdalla S., Abellan X., Balsamo G., Bechtold P., Biavati G., Bidlot  
204 J., Bonavita M., Chiara G. D., Dahlgren P., Dee D., Diamantakis  
205 M., Dragani R., Flemming J., Forbes R., Fuentes  
206 M., Geer A., Haimberger L., Healy S., Hogan R. J., Hólm E., Janisková  
207 M., Keeley S., Laloyaux P., Lopez P., Lupu C., Radnoti G., Rosnay P.  
208 D., Rozum I., Vamborg F., Villaume S., and Thépaut, J. N.: The ERA5 global  
209 reanalysis, Q. J. R. Meteorol. Soc., 146, 1999-2049, <https://doi.org/10.1002/qj.3803>,  
210 2020.

211 Hu, C., Feng, L., Lee, Z., Franz, B. A., Bailey, S. W., Werdell, P. J., and Proctor, C.  
212 W.: Improving satellite global chlorophyll a data products through algorithm  
213 refinement and data recovery, J. Geophys. Res.-Oceans, 124(3), 1524-1543,  
214 <https://doi.org/10.1029/2019JC014941>, 2019.

215 Lan, X., Tans, P., Thoning, K., and NOAA Global Monitoring Laboratory: NOAA  
216 Greenhouse Gas Marine Boundary Layer Reference - CO<sub>2</sub>, NOAA GML [Data set],  
217 <https://doi.org/10.15138/DVNP-F961>, 2023.

218 Landschützer, P., Laruelle, G. G., Roobaert, A., and Regnier, P.: A  
219 uniform pCO<sub>2</sub> climatology combining open and coastal oceans, Earth Syst. Sci. Data,  
220 12, 2537–2553, <https://doi.org/10.5194/essd-12-2537-2020>, 2020.

221 Lee, Z., Weidemann, A., Kindle, J., Arnone, R., Carder, K. L., and Davis, C.: Euphotic  
222 zone depth: Its derivation and implication to ocean-color remote sensing, J. Geophys.  
223 Res., 112, C3, <https://doi.org/10.1029/2006JC003802>, 2007.

224 Menemenlis, D., Campin, J. M., Heimbach, P., Hill, C., Lee, T., Nguyen, A., Schodlok,  
225 M., and Zhang, H.: ECCO2: High resolution global ocean and sea ice data  
226 synthesis, *Mercat. Ocean Q. Newsl*, 31, 13-21, 2008.

227 Sandwell, D. T., Harper, H., Tozer, B., and Smith, W. H.: Gravity field recovery from  
228 geodetic altimeter missions, *Adv. Space Res.*, 68(2), 1059-1072,  
229 <https://doi.org/10.1016/j.asr.2019.09.011>, 2021.

230 Werdell, P. J., Franz, B. A., Bailey, S. W., Feldman, G. C., Boss, E., Brando, V. E.,  
231 Dowell M., Hirata T., Lavender S. J., Lee, Z., Loisel H., Maritorena S., Mélin F.,  
232 Moore T. S., Smyth T. J., Antoine D., Devred E., d'Andon O. H. F., and Mangin, A.:  
233 Generalized ocean color inversion model for retrieving marine inherent optical  
234 properties. *Appl. Optics*, 52(10), 2019-2037, <https://doi.org/10.1364/AO.52.002019>,  
235 2013.

236 Wolter, K. and Timlin, M. S.: El Niño/Southern Oscillation behaviour since 1871 as  
237 diagnosed in an extended multivariate ENSO index (MEI. ext), *Int. J. Climatol.*, 31,  
238 1074-1087, <https://doi.org/10.1002/joc.2336>, 2011.

239 Zhong, G., Li, X., Song, J., Qu, B., Wang, F., Wang, Y., Zhang, B., Sun, X., Zhang,  
240 W., Wang, Z., Ma, J., Yuan, H., and Duan, L.: Reconstruction of global surface  
241 ocean  $p\text{CO}_2$  using region-specific predictors based on a stepwise FFNN regression  
242 algorithm, *Biogeosciences*, 19, 845–859, <https://doi.org/10.5194/bg-19-845-2022>,  
243 2022.

244
